# Supplementary material for: Scale-up preparation, column chromatography-free purification of protected carbonyl-containing biomass molecules and their derivatizations
Source: Royal Society of Chemistry journal article supplement (doi:10.1039/d3gc02715e), 2023-01-01
Supplement: d3gc02715e1.pdf [file d3gc02715e1.pdf]

Supporting information for

# Scale-up Preparation, Column Chromatography-Free Purification of Protected Carbonyl Containing Biomass Molecules and Their Derivatizations

**Lei Huang,<sup>a†</sup> Chen Li,<sup>a†</sup> Zhidong An,<sup>a</sup> Heqi Zhang,<sup>a</sup> Dionisios G.  
Vlachos<sup>\*b</sup> and Jiang Li<sup>\*a</sup>**

*<sup>a</sup> College of New Energy and Materials, China University of Petroleum (Beijing),  
Beijing 102249, China.*

*<sup>b</sup> Department of Chemical and Biomolecular Engineering and Catalysis Center for  
Energy Innovation, University of Delaware, 221 Academy St., Newark,  
Delaware 19716, United State.*

\* Correspondence and requests for materials should be addressed to the author:

Jiang Li ([lijiang@cup.edu.cn](mailto:lijiang@cup.edu.cn)) Dionisios G. Vlachos ([vlachos@udel.edu](mailto:vlachos@udel.edu))

† These authors contributed equally.

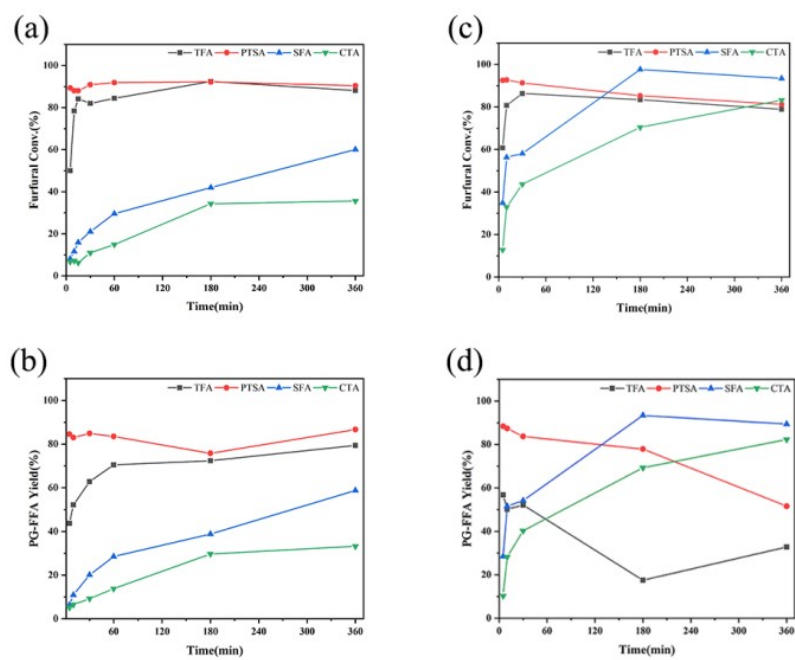

**Figure S1.** Effect of reaction time on furfural acetalization over sulfamic acid (SFA) catalyst. a) furfural conversion at 30 °C. b) PG-FFA yield at 30 °C. c) furfural conversion at 60 °C. d) PG-FFA yield at 60 °C. Reaction conditions: 1 mmol furfural, 4 mmol 1,3-propylene glycol, 1 mmol catalyst, 3 mL dichloromethane solvent.

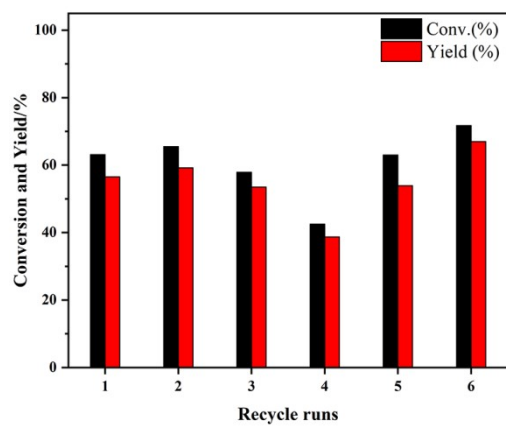

**Figure S2.** Recycling tests at a higher SFA loading. Reaction conditions: 1 mmol HMF, 4 mmol 1,3-propylene glycol, 1mmol SFA catalyst, 60 °C, 10 min, 3 mL dichloromethane solvent.

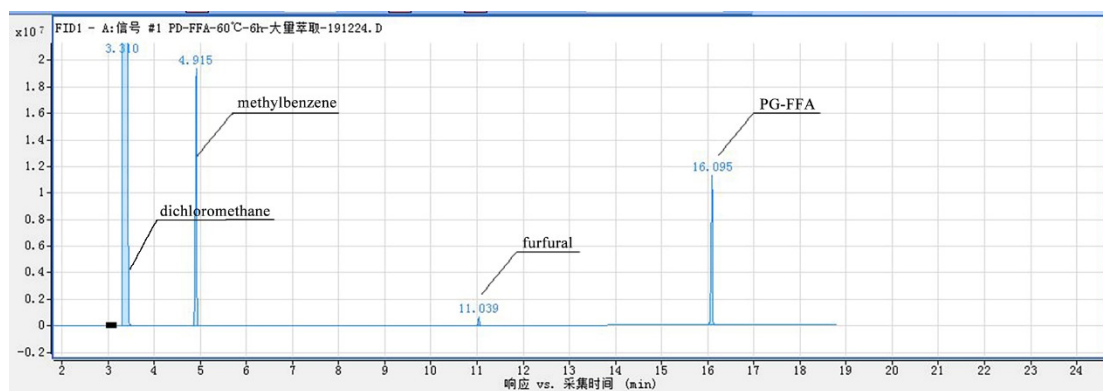

**Figure S3.** GC spectra of PG-FFA after purification. Reaction conditions: 10 mmol furfural, 40 mmol 1,3-propylene glycol, 1 mmol SFA catalyst, 60 °C, 6 h, 60 mL dichloromethane.

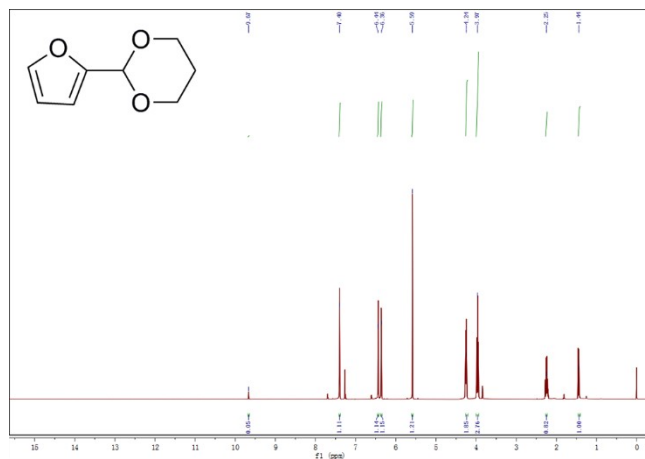

**Figure S4.** <sup>1</sup>H NMR spectra of PG-FFA after purification. Reaction conditions: 10 mmol furfural, 40 mmol 1,3-propylene glycol, 1 mmol SFA catalyst, 60 °C, 6 h, 60 mL dichloromethane. 2-(furan-2-yl)-1,3-dioxane (PG-FFA): <sup>1</sup>H NMR (600 MHz, CDCl<sub>3</sub>) 6.44 (d, 1H), 6.36 (d, 1H), 5.59 (s, 1H), 4.24 (m, 2H), 3.97 (m, 3H), 2.25 (m, 1H), 1.44 (m, 1H).

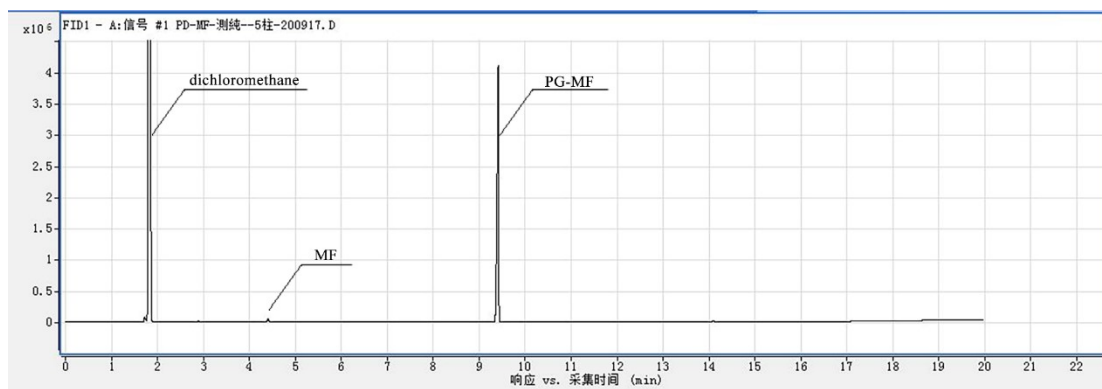

**Figure S5.** GC spectra of PG-MF after purification. Reaction conditions: 10 mmol MF, 60 mmol 1,3-propylene glycol, 1 mmol SFA catalyst, 80 °C, 6 h, 60 mL dichloromethane.

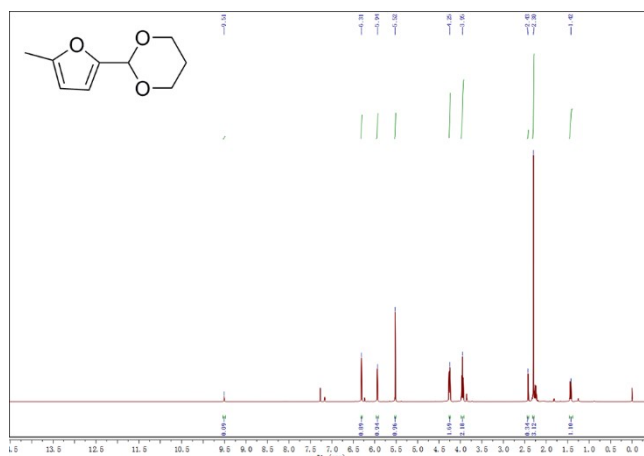

**Figure S6.** <sup>1</sup>H NMR spectra of PG-MF after purification. Reaction conditions: 10 mmol MF, 60 mmol 1,3-propylene glycol, 1 mmol SFA catalyst, 80 °C, 6 h, 60 mL dichloromethane. 2-(5-methylfuran-2-yl)-1,3-dioxane (PG-MF): <sup>1</sup>H NMR (600 MHz, CDCl<sub>3</sub>) 6.31 (d, 1H), 5.94 (d, 1H), 5.52 (s, 1H), 4.25 (s, 2H), 3.95 (m, 2H), 2.43 (m, 1H), 2.30 (m, 3H), 1.42 (m, 1H).

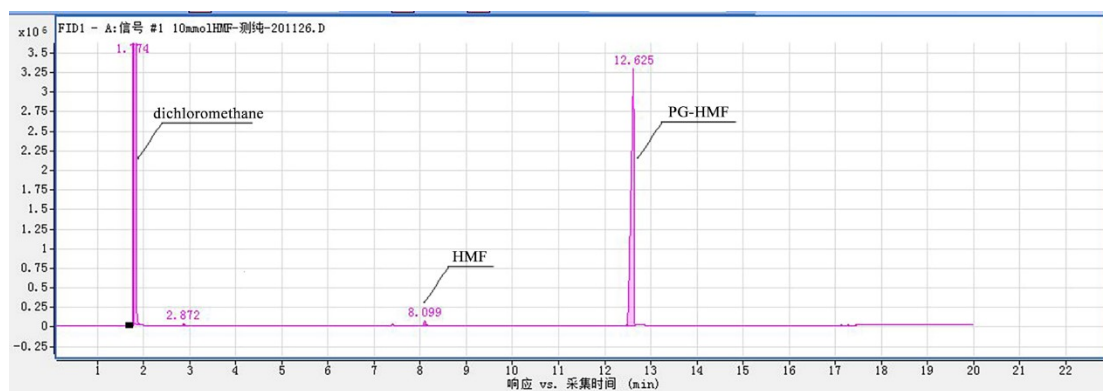

**Figure S7.** GC spectra of PG-HMF after purification. Reaction conditions: 10 mmol HMF, 70 mmol 1,3-propylene glycol, 3 mmol SFA catalyst, 25 °C, 0.5 h, 60 mL dichloromethane.



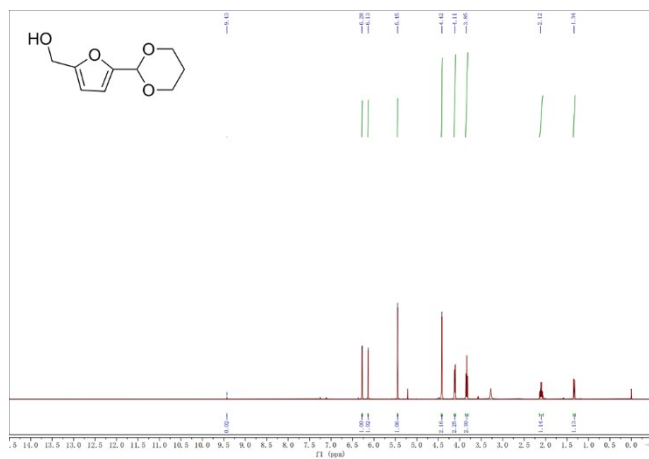

**Figure S8.**  $^1\text{H}$  NMR spectra of PG-HMF after purification. Reaction conditions: 10 mmol HMF, 70 mmol 1,3-propylene glycol, 3 mmol SFA catalyst, 25 °C, 0.5 h, 60 mL dichloromethane. (5-(1,3-dioxan-2-yl)furan-2-yl)methanol (PG-HMF):  $^1\text{H}$  NMR (600 MHz,  $\text{CDCl}_3$ ), 6.25 (d, 1H), 6.12 (d, 1H), 5.43 (s, 1H), 4.38 (s, 2H), 4.08 (m, 2H), 3.81 (m, 2H), 2.06 (m, 1H), 1.30 (m, 1H).

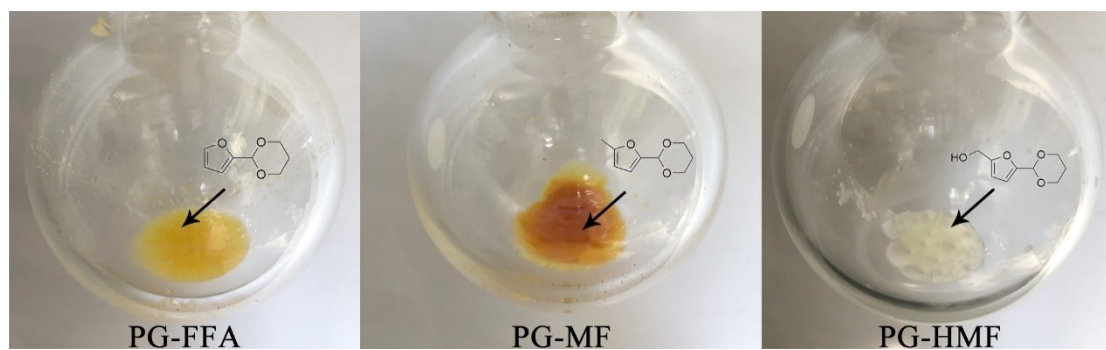

**Figure S9.** Purified acetals of FFA, MF, and HMF. Reaction conditions: PG-FFA:10 mmol furfural, 40 mmol 1,3-propylene glycol, 1 mmol SFA catalyst, 60 °C, 6 h, 60 mL dichloromethane. PG-MF:10 mmol MF, 60 mmol 1,3-propylene glycol, 1 mmol SFA catalyst, 80 °C, 6 h, 60 mL dichloromethane. PG-HMF:10 mmol HMF, 70 mmol 1,3-propylene glycol, 3 mmol SFA catalyst, 25 °C, 0.5 h, 60 mL dichloromethane.

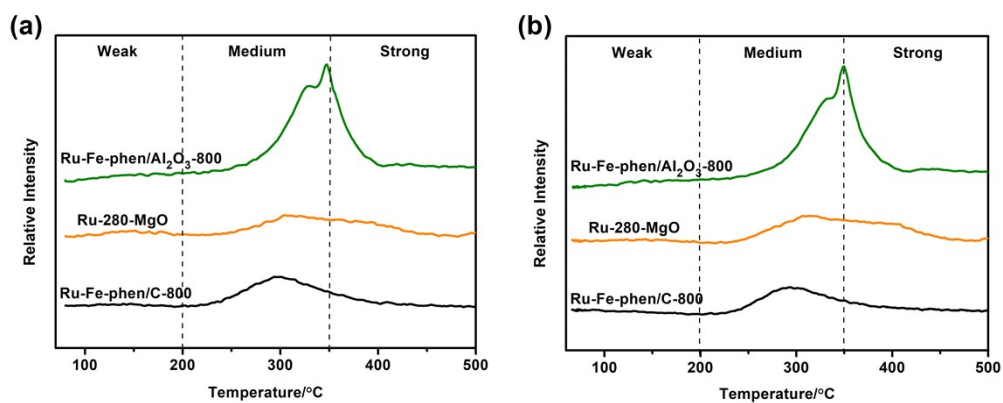

**Figure S10.**  $\text{NH}_3$ - (a) and  $\text{CO}_2$ -TPD (b) profiles of the Ru-Fe-phen/ $\text{Al}_2\text{O}_3$ -800, Ru-280-MgO and Ru-Fe-phen/C-800 catalysts.

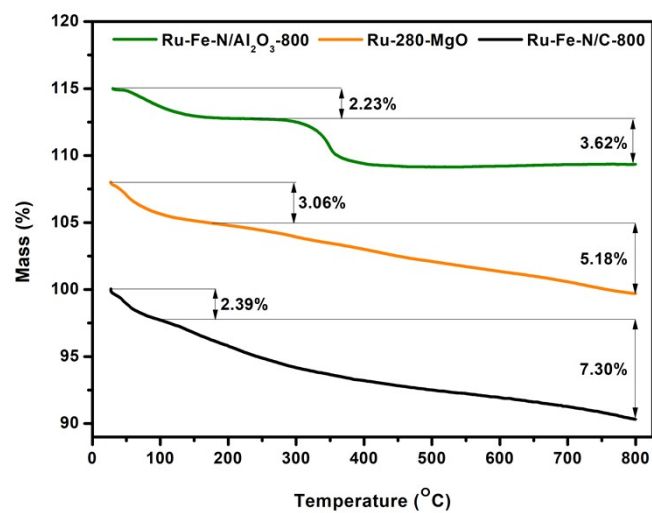

**Figure S11.** TGA profiles of Ru-Fe-phen/Al<sub>2</sub>O<sub>3</sub>-800, Ru-280-MgO and Ru-Fe-phen/C-800 catalysts.

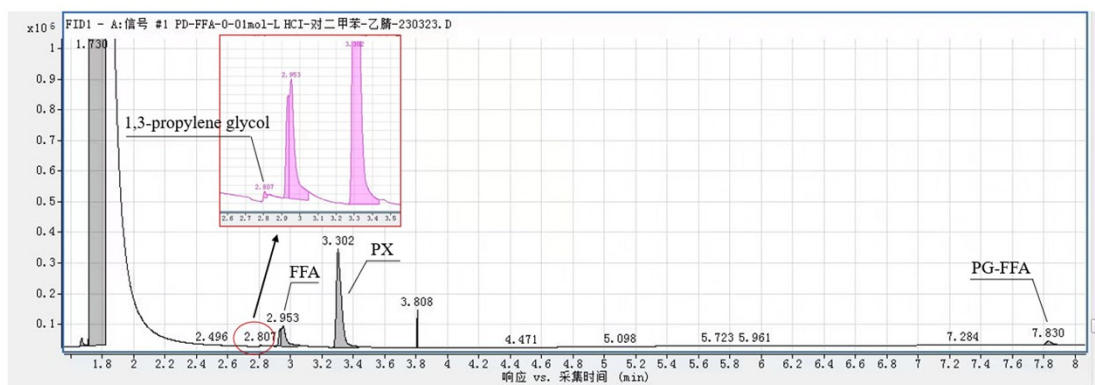

**Figure S12.** GC spectrum of the product solution after deprotection of PG-FFA. Deprotection conditions: 0.25 mmol PG-FFA, 2 mL 0.01 mol/L HCl aqueous solution, room temperature, 30 s. After deprotection, the solution is neutralized by 0.05 mol/L NaOH aqueous solution, and then diluted 10 fold with  $\text{CH}_3\text{CN}$  to collect the GC spectrum.

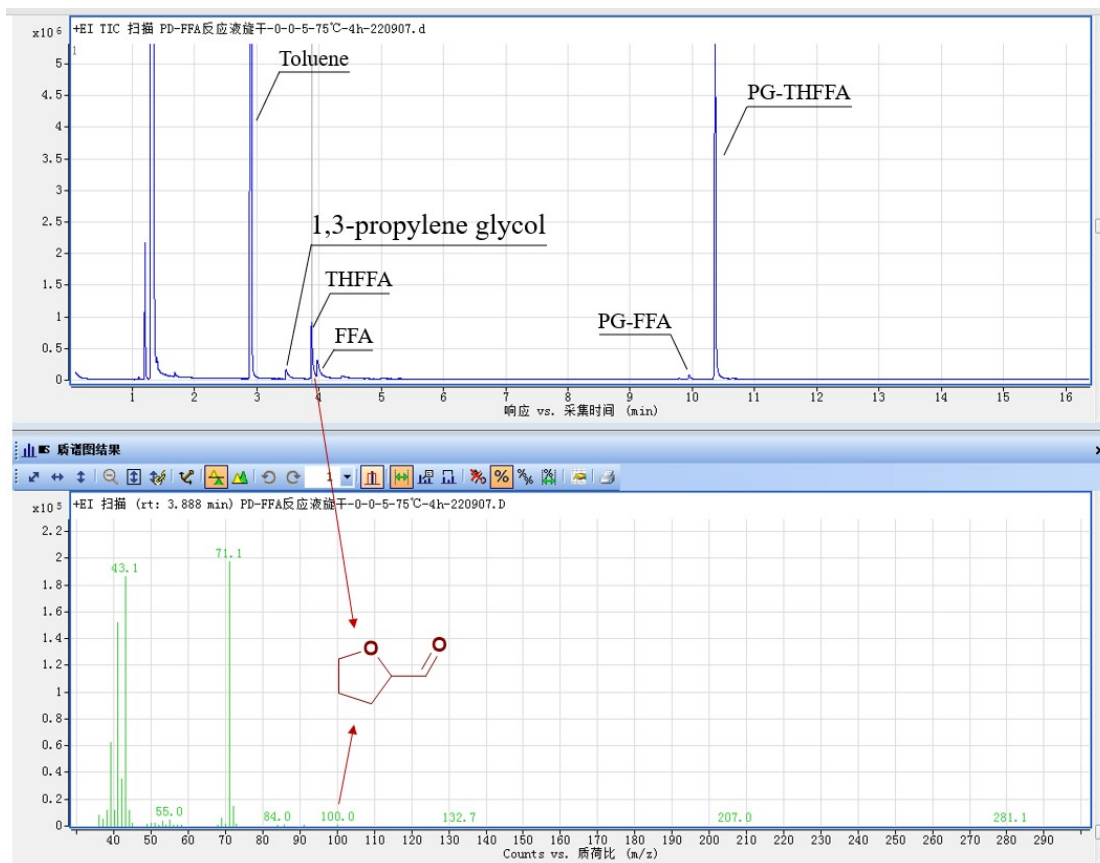

**Figure S13.** GC-MS spectra of the extracted solution after deprotection of PG-THFFA. PG-THFFA is first obtained by ring hydrogenation of PG-FFA. After removal of heterogeneous catalyst, 2 mL 0.05 mol/L HCl aqueous solution is added, and the deprotection is operated at 75 °C for 4 h. Then the solution is neutralized by NaOH followed by extraction by dichloromethane for three times.

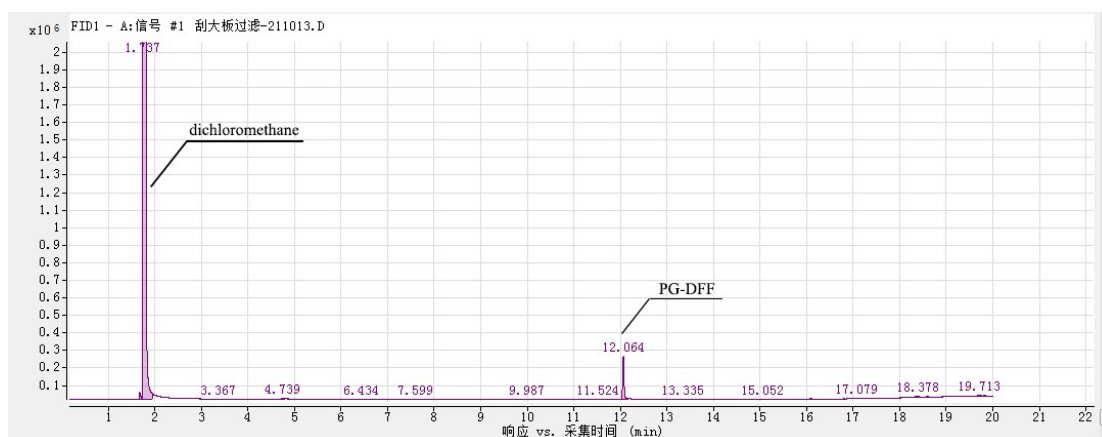

**Figure S14.** GC spectrum of PG-DFF after purification. Reaction conditions: 1 mmol DFF, 2 mmol 1,3-propylene glycol, 0.3 mmol SFA catalyst, 25 °C, 8 h, 6 mL dichloromethane. After reaction, PG-DFF is purified via preparative thin-layer chromatography (PTLC) using dichloromethane and ethyl acetate as elution solvents. The colored product under UV light was scraped off and transferred into a glass flask. Dichloromethane was then used to dissolve PG-DFF, and solid silica gel was removed by filtration. The rotary evaporation of liquid fraction afforded pure PG-DFF sample.

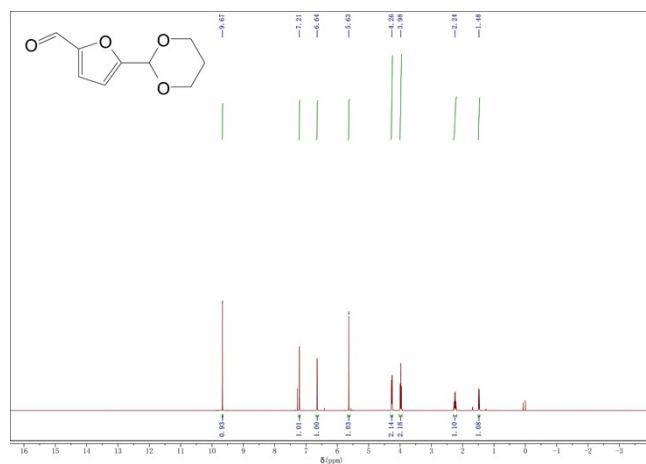

**Figure S15.** <sup>1</sup>H NMR spectra of purified PG-DFF. 5-(1,3-dioxan-2-yl)furan-2-carbaldehyde (PG-DFF): <sup>1</sup>H NMR (600 MHz, CDCl<sub>3</sub>), 9.67 (s, 1H), 7.21 (d, 1H), 6.64 (d, 1H), 5.63 (s, 1H), 4.26 (m, 2H), 3.98 (m, 2H), 2.24 (m, 1H), 1.48 (m, 1H).



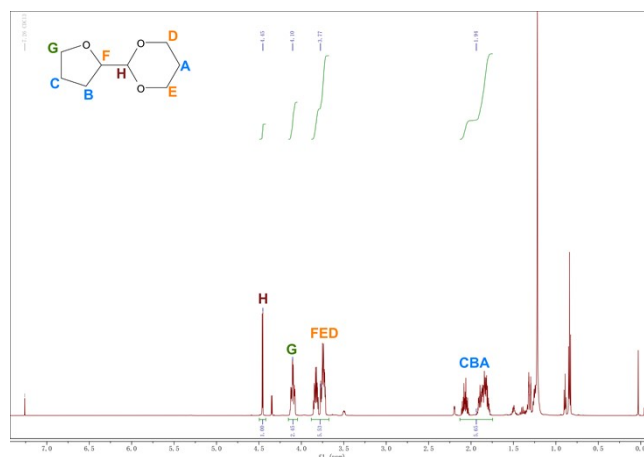

**Figure S16.** <sup>1</sup>H NMR spectra of crude sample of acetal of tetrahydrofurfural (PG-THFFA). PG-THFFA was obtained from ring hydrogenation of furfural. Reaction conditions: 0.5 mmol furfural, 160 °C, 2 h, 4 MPa H<sub>2</sub>, 100 mg catalyst, 20 mL THF. After reaction, heterogeneous Ru-280-MgO catalyst was removed via filtration, and then the solvent in percolate was removed by rotating evaporation at 40 °C.

**Table S1.** Protection group effect in HDO reactions over 1%Ru-Fe-phen/C-800 using 5-20 mmol substrates.<sup>a</sup>

| Entry | Substrate | Mol. /mmol | Conv. /% | Selectivity /% |      |       |      |
|-------|-----------|------------|----------|----------------|------|-------|------|
|       |           |            |          | DMF            | MF   | PG-MF | PG-M |
| 1     | MF        | 5          | 99       | 85.4           | -    | -     | -    |
| 2     |           | 20         | 88.9     | 56.9           | -    | -     | -    |
| 3     | PG-MF     | 5          | 98.1     | 80.0           | 1.7  | -     | -    |
| 4     |           | 20         | 91.4     | 38.7           | 12.8 | -     | -    |
| 5     | HMF       | 5          | >99.9    | 64.6           | -    | -     | -    |
| 6     | PG-HMF    | 5          | >99.9    | 36.9           | -    | -     | -    |

<sup>a</sup> Reaction conditions: 240 °C, 12 h, 4 MPa H<sub>2</sub>, 100 mg catalyst, 10 mL THF in reactions using 5-20 mmol substrates.

**Table S2.** Photo-oxidation of HMF and its acetals over TiO<sub>2</sub> and Cd<sub>1.5</sub>In<sub>2</sub>S<sub>4.5</sub>.<sup>a</sup>

| Entry | Catalyst                                           | Substrate | Conc./<br>mmol | Incident<br>light/nm        | t  | Conv./% | Yield/% |        | Sel./<br>% |     |
|-------|----------------------------------------------------|-----------|----------------|-----------------------------|----|---------|---------|--------|------------|-----|
|       |                                                    |           |                |                             |    |         | DFF     | PG-DFF |            |     |
| 1     | TiO <sub>2</sub> ,<br>anatase                      | HMF       | 0.1            | 467                         | 4  | 19.46   | 3.76    | -      | 19.3       |     |
| 2     |                                                    | PG-HMF    |                |                             |    | 7.5     | -       | 4.1    | 54.7       |     |
| 3     |                                                    | HMF       | 0.02           | White<br>light <sup>b</sup> |    | >99.9   | 5.53    | -      | 5.53       |     |
| 4     |                                                    | PG-HMF    |                |                             |    | >99.9   | -       | 3.86   | 3.86       |     |
| 5     | P25                                                | HMF       | 0.1            | 467                         | 12 | 16.56   | 2.68    | -      | 6.2        |     |
| 6     |                                                    | PG-HMF    |                |                             |    | 30.6    | -       | 3.63   | 11.7       |     |
| 7     | Cd <sub>1.5</sub> In <sub>2</sub> S <sub>4.5</sub> | HMF       | 0.1            | 467                         |    | 6       | 93.9    | 4.7    | -          | 5.0 |
| 8     |                                                    | PG-HMF    |                |                             |    |         | 91.9    | -      | 6.7        | 7.3 |

<sup>a</sup> Reaction conditions: 0.02-0.1 mmol substrate, 20 mg photocatalyst,  $\lambda = 467$  nm, room temperature, O<sub>2</sub> balloon, 3 mL CH<sub>3</sub>CN. <sup>b</sup>Xe lamp.  $\lambda = 320$ -780 nm.
